# Supplementary material for: On the suitability of the Thorpe–Mason model for calculating sublimation of saltating snow
Source: Copernicus journal article supplement (doi:10.5194/tc-12-3499-2018), 2018-11-09
Supplement: Supplementary file [file tc-12-3499-2018-supplement-title-page.pdf › tc-12-3499-2018-supplement-title-page.pdf]

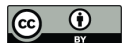

## *Supplement of*

# **On the suitability of the Thorpe–Mason model for calculating sublimation of saltating snow**

**Varun Sharma et al.**

*Correspondence to:* Varun Sharma ([varun.sharma@epfl.ch](mailto:varun.sharma@epfl.ch))

- [tc-12-3499-2018-supplement-title-page.pdf](#)
- Supplement
  - .DS\_Store
  - Supplementary.pdf
  - Supplementary\_Movie\_M1.mp4
  - Supplementary\_Movie\_M2.mp4

The copyright of individual parts of the supplement might differ from the CC BY 4.0 License.
